# Supplementary material
Source: Springer Nature journal article supplement (https://www.springermedizin.de/resource/supplementary/12936_2007_530_MOESM2_ESM.pdf/9548204)
Supplement: MOESM2 [file 9548204]

8363 Patients  
screened

1873 Patients  
with microscopically confirmed  
*Plasmodium falciparum* malaria

439 Excluded  
95 Refused consent  
344 Did not meet Inclusion criteria

1434 Randomized  
202 in Ejeda  
273 in Miandrivazo  
139 in Tsiroanomandidy  
102 in Andapa  
248 in Ihosy  
222 in Maevatanana  
161 in Moramanga  
87 in Farafangana

320  
Randomized to  
Receive Chloroquine

385  
Randomized to  
receive Amodiaquine

383  
Randomized to receive  
Sulfadoxine/Pyrimethamine

346  
Randomized to receive  
Artesunate/Amodiaquine

Status at follow-up Day 14  
309 Evaluable  
10 Lost to follow-up  
1 Withdrawn

Status at follow-up Day 14  
372 Evaluable  
10 Lost to follow-up  
3 Withdrawn

Status at follow-up Day 14  
368 Evaluable  
12 Lost to follow-up  
3 Withdrawn

Status at follow-up Day 14  
335 Evaluable  
11 Lost to follow-up  
0 Withdrawn

Status at follow-up Day 28  
300 Evaluable  
6 Lost to follow-up  
3 Withdrawn

Status at follow-up Day 28  
356 Evaluable  
13 Lost to follow-up  
4 Withdrawn

Status at follow-up Day 28  
361 Evaluable  
1 Lost to follow-up  
6 Withdrawn

Status at follow-up Day 28  
330 Evaluable  
5 Lost to follow-up  
0 Withdrawn

300 Included in primary  
analysis At Day 28  
50 in Ejeda  
58 in Ihosy  
66 in Miandrivazo  
52 in Maevatanana  
38 in Tsiroanomandidy  
36 in Moramanga  
0 in Andapa  
0 in Farafangana

356 Included in primary  
analysis At Day 28  
48 in Ejeda  
53 in Ihosy  
66 in Miandrivazo  
53 in Maevatanana  
39 in Tsiroanomandidy  
36 in Moramanga  
32 in Andapa  
29 in Farafangana

361 Included in primary  
analysis At Day 28  
50 in Ejeda  
59 in Ihosy  
64 in Miandrivazo  
51 in Maevatanana  
40 in Tsiroanomandidy  
38 in Moramanga  
29 in Andapa  
30 in Farafangana

330 Included in primary  
analysis At Day 28  
50 in Ejeda  
57 in Ihosy  
65 in Miandrivazo  
50 in Maevatanana  
0 in Tsiroanomandidy  
38 in Moramanga  
41 in Andapa  
29 in Farafangana
